# Supplementary material for: Interferon-Stimulated Exonuclease Gene 20 is A Prognosis and Predictive Biomarker and Correlated with Macrophages M2 Polarization in Glioblastoma: A Pan-Cancer Analysis
Source: Research Square preprint supplement (doi:10.21203/rs.3.rs-1238023/v1), 2022-01-14
Supplement: Supplementary file 2 [file 6ba09de56ca16418093e256f.docx]

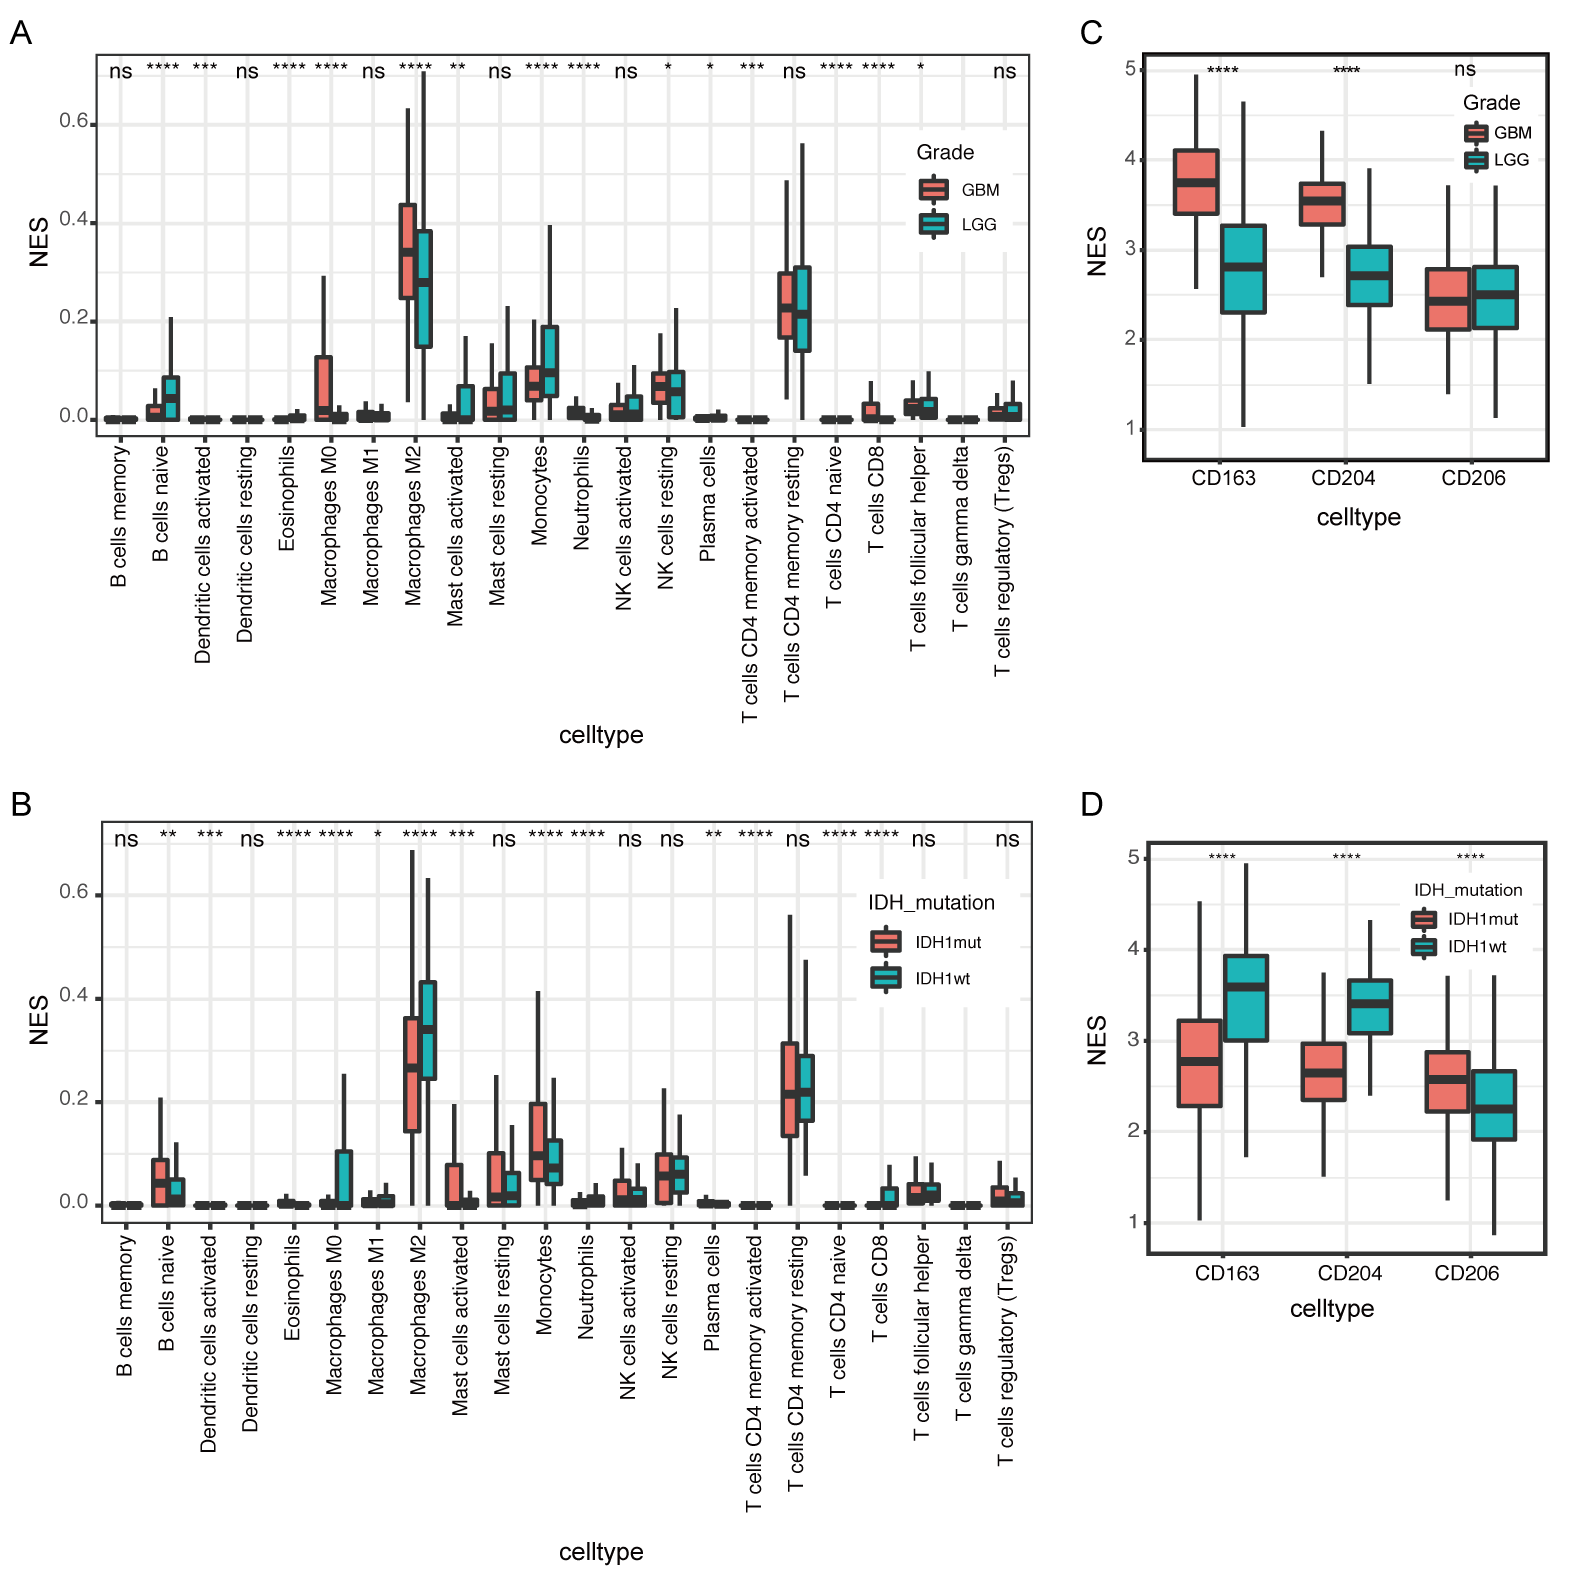


Figure S2 (A) The varied proportions of 22 subtypes of immune cells in human LGG tissues (LGG) and human GBM tissues (GBM). (B) The varied proportions of 22 subtypes of immune cells IDH1wt and IDH1mut groups. (C) CD163 and CD204 expression were significantly up-regulated in GBM group compared to LGG group. (D) CD163 and CD204 expression were significantly up-regulated in IDH1wt group compared to IDH1mut group in GBM. P < 0.05. * P<0.05; ** P<0.01; *** P<0.001; **** P<0.0001.
