# Supplementary figures and images for: Interferon-Stimulated Exonuclease Gene 20 is A Prognosis and Predictive Biomarker and Correlated with Macrophages M2 Polarization in Glioblastoma: A Pan-Cancer Analysis
Source: Research Square preprint supplement (doi:10.21203/rs.3.rs-1238023/v1), 2022-01-14

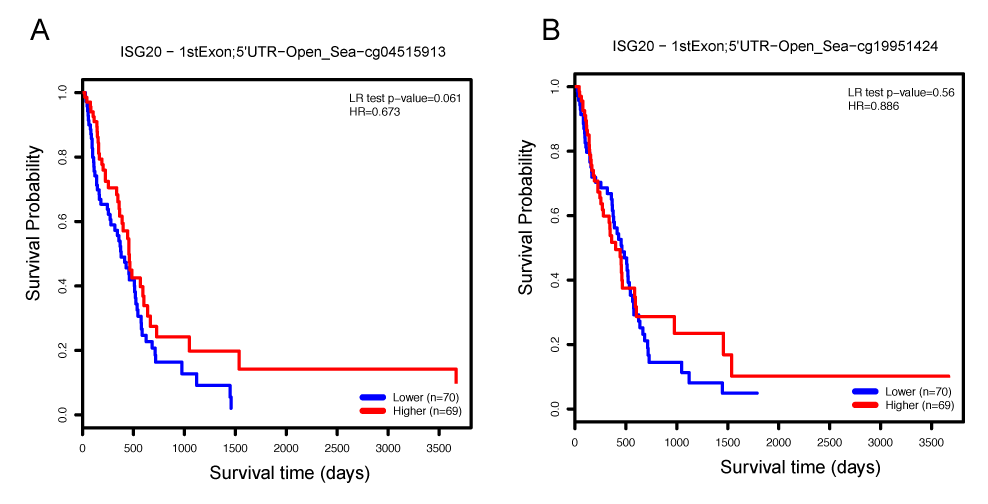


Figure S1 OS curve of cg04515913 (A) and cg19951424 (B) in GBM patients using MethSurv tool. *P* < 0.05.

Supplement: Supplementary file 1 [file 25e80cd570c02ad11cd54eb3.docx]
